# Supplementary material
Source: HighWire-hosted journal article supplement (https://bmjopen.bmj.com/content/9/6/e028578)
Supplement: inline-supplementary-material-1 [file inline-supplementary-material-1.pdf]

**GPPAD-POInT Study: Visit-schedule (Study Flow Chart)**

| POInT Trial                                                                                | Trial                 |                                         |                                          |                                       |                                       |      |                           |      |                           |      |                           |      |                           |
|--------------------------------------------------------------------------------------------|-----------------------|-----------------------------------------|------------------------------------------|---------------------------------------|---------------------------------------|------|---------------------------|------|---------------------------|------|---------------------------|------|---------------------------|
|                                                                                            | Screening Phase       | Intervention                            |                                          |                                       |                                       |      |                           |      |                           |      |                           |      |                           |
|                                                                                            |                       | baseline visit<br>(age 4 - 7 months)    | visit 2 months<br>post baseline          | visit<br>4 months<br>post<br>baseline | visit<br>8 months<br>post<br>baseline | call | visit at age<br>1.5 years | call | visit at age<br>2.0 years | call | visit at age<br>2.5 years | call | visit at age<br>3.0 years |
| Visits                                                                                     |                       |                                         |                                          |                                       |                                       |      |                           |      |                           |      |                           |      |                           |
| Visit window                                                                               | below 7 months of age | ± 10d                                   | ± 10d                                    | ± 10d                                 | ± 10d                                 |      | ± 10d                     |      | ± 14d                     |      | ± 14d                     |      | ± 14d                     |
| Study visit                                                                                | 0                     | 1                                       | 2                                        | 3                                     | 4                                     |      | 5                         |      | 6                         |      | 7                         |      | 8                         |
| Study call                                                                                 |                       |                                         |                                          |                                       |                                       | 1    |                           | 2    |                           | 3    |                           |      | 4                         |
| Informed consent                                                                           | X*                    | X                                       |                                          |                                       |                                       |      |                           |      |                           |      |                           |      |                           |
| Review Incl./Excl. Criteria                                                                | X                     | X                                       |                                          |                                       |                                       |      |                           |      |                           |      |                           |      |                           |
| Randomization                                                                              |                       | X                                       |                                          |                                       |                                       |      |                           |      |                           |      |                           |      |                           |
| Medical History                                                                            |                       | X                                       |                                          |                                       |                                       |      |                           |      |                           |      |                           |      |                           |
| Psychological impact Questionnaire (mother&father)                                         |                       |                                         |                                          | X                                     |                                       |      | X                         |      |                           |      |                           |      | X                         |
| Antibodies measurement (IAA; GADA; IA-2A; ZnT8RA; ZnT8WA; TS7A)                            |                       | X                                       | X                                        | X                                     | X                                     |      | X                         |      | X                         |      | X                         |      | X                         |
| Vitamin D (25OHD) <sup>B</sup>                                                             |                       | X                                       | X                                        | X                                     | X                                     |      | X                         |      | X                         |      | X                         |      | X                         |
| Intervention                                                                               |                       |                                         |                                          |                                       |                                       |      |                           |      |                           |      |                           |      |                           |
| dispense medication (+ compliance data sheet)dispense medication (+ compliance data sheet) |                       | X                                       | X                                        | X                                     | X                                     |      | X                         |      | X                         |      | X                         |      |                           |
| Treatment                                                                                  |                       | daily with 7,5 mg<br>Insulin OR Placebo | daily with 22,5 mg<br>Insulin OR Placebo | daily with 67,5 mg Insulin OR Placebo |                                       |      |                           |      |                           |      |                           |      |                           |
| Investigations                                                                             |                       |                                         |                                          |                                       |                                       |      |                           |      |                           |      |                           |      |                           |
| Physical examination (height, weight)                                                      |                       | X                                       | X                                        | X                                     | X                                     |      | X                         |      | X                         |      | X                         |      | X                         |
| Assessment of AEs and SAEs <sup>E</sup>                                                    |                       | X                                       | X                                        | X                                     | X                                     |      | X                         |      | X                         |      | X                         |      | X <sup>E</sup>            |
| Blood glucose (0/30/60/120) <sup>C</sup>                                                   |                       | X                                       | X                                        | X                                     | X                                     |      |                           |      |                           |      |                           |      |                           |
| Blood glucose                                                                              |                       |                                         |                                          |                                       |                                       |      | X                         |      | X                         |      | X                         |      | (X) <sup>A</sup>          |
| Differential blood count                                                                   |                       | X <sup>F</sup>                          |                                          |                                       |                                       |      |                           |      |                           |      |                           |      | X                         |
| OGTT (0/30/60/90/120) <sup>D</sup>                                                         |                       |                                         |                                          |                                       |                                       |      |                           |      |                           |      |                           |      | X <sup>D</sup>            |
| blood volumes for protocol parameters (mL):                                                |                       | 5.0                                     | 3.8                                      | 3.8                                   | 3.8                                   |      | 3.8                       |      | 3.8                       |      | 3.8                       |      | 5-11                      |
| blood volumes for protocol parameters (%):                                                 |                       | 0.8-1.0                                 | 0.5-0.6                                  | 0.5-0.6                               | 0.4-0.5                               |      | 0.4                       |      | 0.4                       |      | 0.3                       |      | 0.4-0.9                   |
| additional biobank blood volumes (mL):                                                     |                       | 7.5                                     | 10.1                                     | 10.1                                  | 17.6                                  |      | 17.6                      |      | 22.5                      |      | 17.6                      |      | 17.6-22.5                 |
| Total blood volumes (mL):                                                                  |                       | 12.5                                    | 13.9                                     | 13.9                                  | 21.4                                  |      | 21.4                      |      | 26.3                      |      | 21.4                      |      | 27.5-28.6                 |
| Total blood volume (%)*:                                                                   |                       | 1.9-2.4                                 | 2.0-2.2                                  | 1.8-2.0                               | 2.5-2.8                               |      | 2.4                       |      | 2.7                       |      | 2.0                       |      | 2.3-2.4                   |

\* Start of Informed consent process

<sup>A</sup> In autoantibody positive children who will have an OGTT, a separate blood glucose sample is **not** taken.

<sup>B</sup> Measurement of Vitamin D level is recommended at each visit however a single missing vitamin D value will not be considered as protocol violation.

If a vitamin D level < 75 nmol/L will be assessed during intervention, family pediatrician will be advised to supplement patient with 1000 IU vitamin D daily

<sup>C</sup> Blood glucose measurements before (0) and 30, 60, 90 and 120 min after administration of the study drug (oral insulin or placebo). Single missing glucose values will not be considered as protocol violation as long as at least 2 of 4 values after administration of study drug and the value before administration of study drug are available.

<sup>D</sup> If the participant developed beta-cell-autoantibodies during trial. OGTT (0/30/60/90/120) will be performed and samples measured in laboratory  
Children who seroconverted to beta-cell-autoantibodies should have a confirmation sample within 4 – 12 weeks (interim visit)

<sup>E</sup> AEs/SAEs/SUSARs will be noted and reported as under intervention phase for 60 days after end of treatment day

<sup>F</sup> Differential blood count may be postponed to another visit within the first year, if it's not possible to collect enough blood for all assessments at baseline. Single missing blood count parameters (except leucocytes and hemoglobine) will not be considered as protocol violation

\*Blood volumes are < 5% NIH/WHO allowance and in accordance to the Pre-POINT, Pre-POINT Early and Fr1da-Intervention studies

GPPAD-POInT Study: Visit-schedule (Study Flow Chart)-version 23.11.2017

| POInT Trial                                                     | Trial                  |                                          |      |                           |      |                           |      |                           |      |                           |      |                           |      |                           |      |                           |      |                           |
|-----------------------------------------------------------------|------------------------|------------------------------------------|------|---------------------------|------|---------------------------|------|---------------------------|------|---------------------------|------|---------------------------|------|---------------------------|------|---------------------------|------|---------------------------|
|                                                                 | Follow-up              |                                          |      |                           |      |                           |      |                           |      |                           |      |                           |      |                           |      |                           |      |                           |
|                                                                 | minimum<br>6 months FU | variable with maximum up to 54 months FU |      |                           |      |                           |      |                           |      |                           |      |                           |      |                           |      |                           |      |                           |
|                                                                 | call                   | visit at age<br>3.5 years                | call | visit at age<br>4.0 years | call | visit at age<br>4.5 years | call | visit at age<br>5.0 years | call | visit at age<br>5.5 years | call | visit at age<br>6.0 years | call | visit at age<br>6.5 years | call | visit at age<br>7.0 years | call | visit at age<br>7.5 years |
| Visits                                                          | call                   | visit at age<br>3.5 years                | call | visit at age<br>4.0 years | call | visit at age<br>4.5 years | call | visit at age<br>5.0 years | call | visit at age<br>5.5 years | call | visit at age<br>6.0 years | call | visit at age<br>6.5 years | call | visit at age<br>7.0 years | call | visit at age<br>7.5 years |
| Visit window                                                    |                        | ± 30d                                    |      | ± 30d                     |      | ± 30d                     |      | ± 30d                     |      | ± 30d                     |      | ± 30d                     |      | ± 30d                     |      | ± 30d                     |      | ± 30d                     |
| Study visit                                                     |                        | 9                                        |      | 10                        |      | 11                        |      | 12                        |      | 13                        |      | 14                        |      | 15                        |      | 16                        |      | 17                        |
| Study call                                                      | 5                      |                                          | 6    |                           | 7    |                           | 8    |                           | 9    |                           | 10   |                           | 11   |                           | 12   |                           | 13   |                           |
| Informed consent                                                |                        |                                          |      |                           |      |                           |      |                           |      |                           |      |                           |      |                           |      |                           |      |                           |
| Review Incl./Excl. Criteria                                     |                        |                                          |      |                           |      |                           |      |                           |      |                           |      |                           |      |                           |      |                           |      |                           |
| Randomization                                                   |                        |                                          |      |                           |      |                           |      |                           |      |                           |      |                           |      |                           |      |                           |      |                           |
| Medical History                                                 |                        |                                          |      |                           |      |                           |      |                           |      |                           |      |                           |      |                           |      |                           |      |                           |
| Psychological impact Questionnaire (mother&father)              |                        | (X) <sup>F</sup>                         |      | (X) <sup>F</sup>          |      | (X) <sup>F</sup>          |      | (X) <sup>F</sup>          |      | (X) <sup>F</sup>          |      | (X) <sup>F</sup>          |      | (X) <sup>F</sup>          |      | (X) <sup>F</sup>          |      | (X) <sup>F</sup>          |
| Antibodies measurement (IAA; GADA; IA-2A; ZnT8RA; ZnT8WA; TS7A) |                        | X                                        |      | X                         |      | X                         |      | X                         |      | X                         |      | X                         |      | X                         |      | X                         |      | X                         |
| Vitamin D (25OHD) <sup>B</sup>                                  |                        |                                          |      |                           |      |                           |      |                           |      |                           |      |                           |      |                           |      |                           |      |                           |
| Intervention                                                    |                        |                                          |      |                           |      |                           |      |                           |      |                           |      |                           |      |                           |      |                           |      |                           |
| dispense medication (+ compliance data sheet)                   |                        |                                          |      |                           |      |                           |      |                           |      |                           |      |                           |      |                           |      |                           |      |                           |
| Treatment                                                       |                        |                                          |      |                           |      |                           |      |                           |      |                           |      |                           |      |                           |      |                           |      |                           |
| Investigations                                                  |                        |                                          |      |                           |      |                           |      |                           |      |                           |      |                           |      |                           |      |                           |      |                           |
| Physical examination (height, weight)                           |                        | X                                        |      | X                         |      | X                         |      | X                         |      | X                         |      | X                         |      | X                         |      | X                         |      | X                         |
| Blood glucose (0/30/60/120) <sup>C</sup>                        |                        | (X) <sup>A</sup>                         |      | (X) <sup>A</sup>          |      | (X) <sup>A</sup>          |      | (X) <sup>A</sup>          |      | (X) <sup>A</sup>          |      | (X) <sup>A</sup>          |      | (X) <sup>A</sup>          |      | (X) <sup>A</sup>          |      | (X) <sup>A</sup>          |
| Differential blood count                                        |                        |                                          |      |                           |      |                           |      |                           |      |                           |      |                           |      |                           |      |                           |      |                           |
| OGTT (0/30/60/90/120) <sup>D</sup>                              |                        | X <sup>D</sup>                           |      | X <sup>D</sup>            |      | X <sup>D</sup>            |      | X <sup>D</sup>            |      | X <sup>D</sup>            |      | X <sup>D</sup>            |      | X <sup>D</sup>            |      | X <sup>D</sup>            |      | X <sup>D</sup>            |
| blood volumes for protocol parameters (mL):                     |                        | 3.8-9.8                                  |      | 3.8-9.8                   |      | 3.8-9.8                   |      | 3.8-9.8                   |      | 3.8-9.8                   |      | 3.8-9.8                   |      | 3.8-9.8                   |      | 3.8-9.8                   |      | 3.8-9.8                   |
| blood volumes for protocol parameters (%):                      |                        | 0.3-0.8                                  |      | 0.3-0.7                   |      | 0.3-0.7                   |      | 0.3-0.6                   |      | 0.2-0.6                   |      | 0.2-0.6                   |      | 0.2-0.5                   |      | 0.2-0.5                   |      | 0.2-0.5                   |
| additional biobank blood volumes (mL):                          |                        | 25.1                                     |      | 25.1                      |      | 25.1                      |      | 30                        |      | 30                        |      | 30                        |      | 30                        |      | 30                        |      | 30                        |
| Total blood volumes (mL):                                       |                        | 28.9-34.9                                |      | 28.9-34.9                 |      | 28.9-34.9                 |      | 33.8-39.8                 |      | 33.8-39.8                 |      | 33.8-39.8                 |      | 33.8-39.8                 |      | 33.8-39.8                 |      | 33.8-39.8                 |
| Total blood volumes (%)*:                                       |                        | 2.5-3.0                                  |      | 2.1-2.6                   |      | 2.1-2.6                   |      | 2.2-2.6                   |      | 2.2-2.6                   |      | 2.0-2.3                   |      | 2.0-2.3                   |      | 1.7-2.0                   |      | 1.7-2.0                   |

<sup>A</sup> In autoantibody positive children who will have an OGTT, a separate blood glucose sample is **not** taken.

<sup>B</sup> If a vitamin D level < 75 nmol/L will be assessed during intervention, family pediatrician will be advised to supplement patient with 1000 IU vitamin D daily

<sup>C</sup> Blood glucose measurements before (0) and 30, 60 and 120 min after administration of the study drug (oral insulin or placebo)

<sup>D</sup> If the participant developed beta-cell-autoantibodies during trial. OGTT (0/30/60/90/120) will be performed and samples measured in laboratory  
Children who seroconverted to beta-cell-autoantibodies should have a confirmation sample within 4 – 12 weeks (interim visit)

<sup>F</sup> hand out of the Psychological Impact Questionnaire only if this visit is child's last follow-up visit (i.e. only at End of Study Visit)

\*Blood volumes are < 5% NIH/WHO allowance and in accordance to the Pre-POINT, Pre-POINT Early and Fr1da-Intervention studies
