# Supplementary material
Source: HighWire-hosted journal article supplement (https://bmjopen.bmj.com/content/9/6/e028578)
Supplement: inline-supplementary-material-2 [file inline-supplementary-material-2.pdf]

Supplementary File 2: GPPAD-POInT Study: Overall recruitment (status March 2019)

**POInT: Overall Recruitment**  
**N = 214**

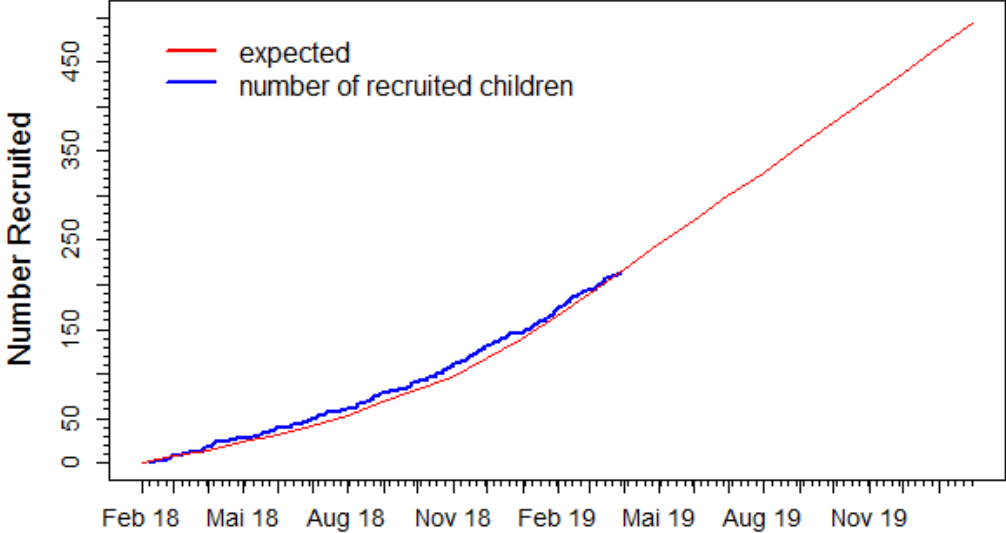

Feb. 2018 to Jan. 2020
